# Supplementary material for: Barrier-to-autointegration-factor (Banf1) modulates DNA double-strand break repair pathway choice via regulation of DNA-dependent kinase (DNA-PK) activity
Source: PubMed Central journal article supplement — Nucleic Acids Res. 2021 Feb 28;49(6):3294–307. doi: 10.1093/nar/gkab110 (PMC8034644; doi:10.1093/nar/gkab110), 2021-02-28
Supplement: gkab110_supplemental_file.pdf [file gkab110_supplemental_file.pdf]

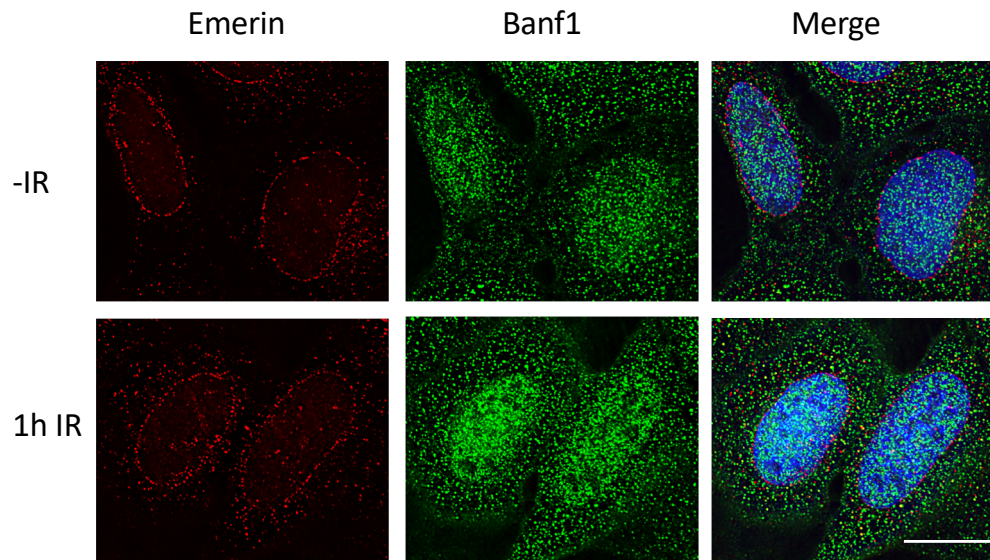

**Supplementary Figure 1.** Banf1 cellular localisation. U2OS cells were treated or mock treated with 6 Gy IR, cells were fixed (without pre-extraction) at the indicated timepoints and stained with the indicated antibodies. Immunofluorescence scale bars represent 10  $\mu\text{m}$ .

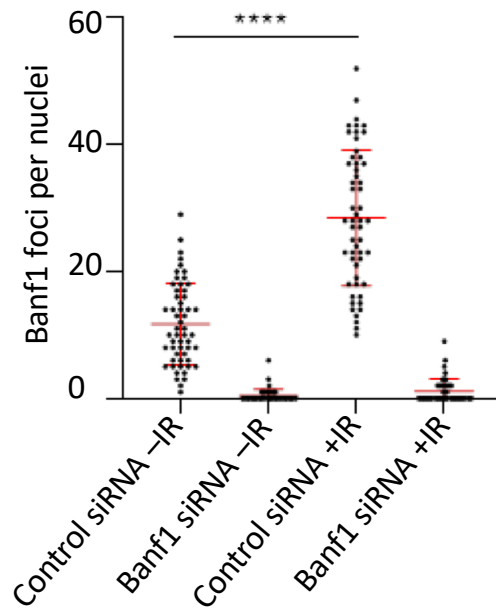

**Supplementary Figure 2.** Banf1 antibody specificity. U2OS cells were transfected with control or Banf1 siRNA. 72 hours after transfection, cells were treated or mock treated with 2 Gy IR, cells were fixed (following pre-extraction) at the indicated timepoints and stained with the indicated antibodies. The number of foci were counted in 50 cells per condition and t-test was used for statistical analysis \*\*\*\*P <0.0001.

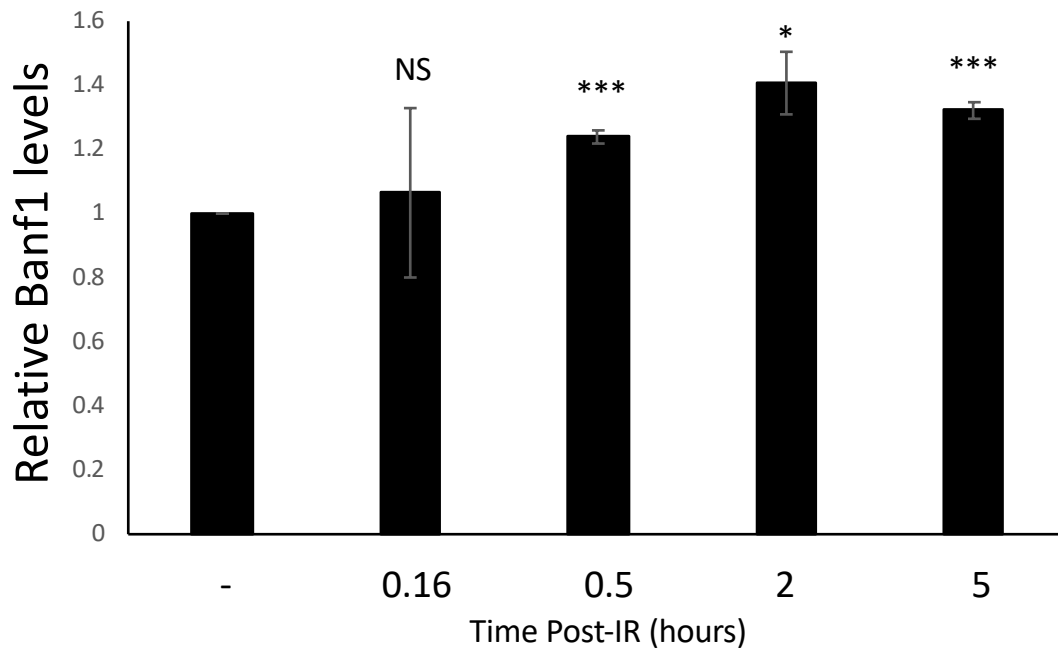

**Supplementary Figure 3.** Banf1 is stabilised following IR treatment. U2OS cells were treated or mock treated with 6 Gy IR and cells were lysed at the indicated timepoints (as in Figure 1d). Lysates were immunoblotted with Banf1 and  $\beta$ -Actin. The densitometry of the Banf1 bands were analysed and normalised to  $\beta$ -Actin. The histogram data represents the mean and S.D. of 2 independent experiments, t-test was used for statistical analysis, comparing each point back to the untreated sample \*P <0.05, \*\*\*P <0.001.

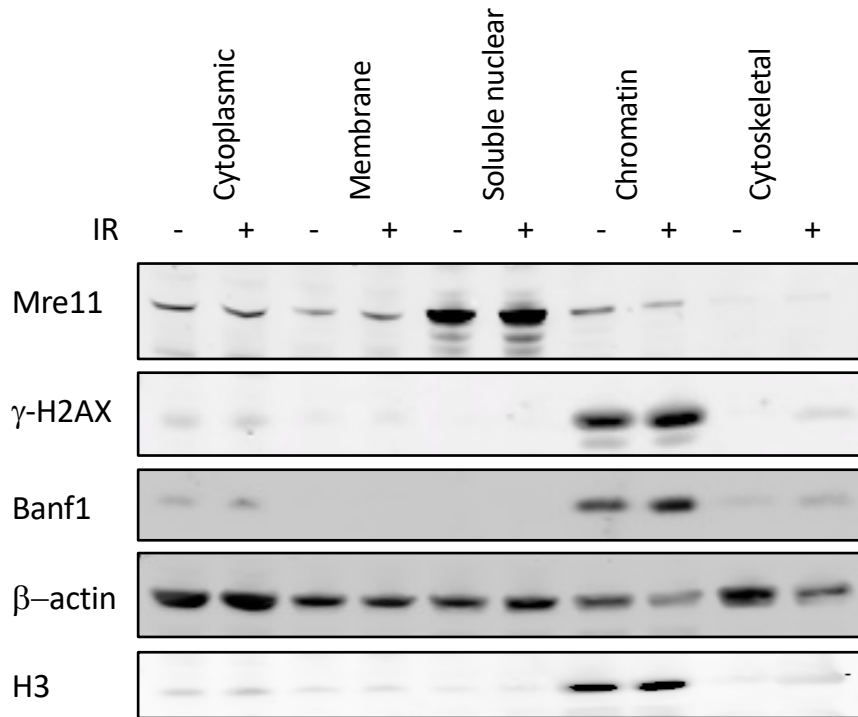

**Supplementary Figure 4.** Banf1 cellular localisation. U2OS cells were treated or mock treated with 6 Gy IR and cells lysed 1 hour post-IR. Lysates were fractionated using a fractionation kit and immunoblotted with the indicated antibodies. Images are representative of 3 independent experiments.

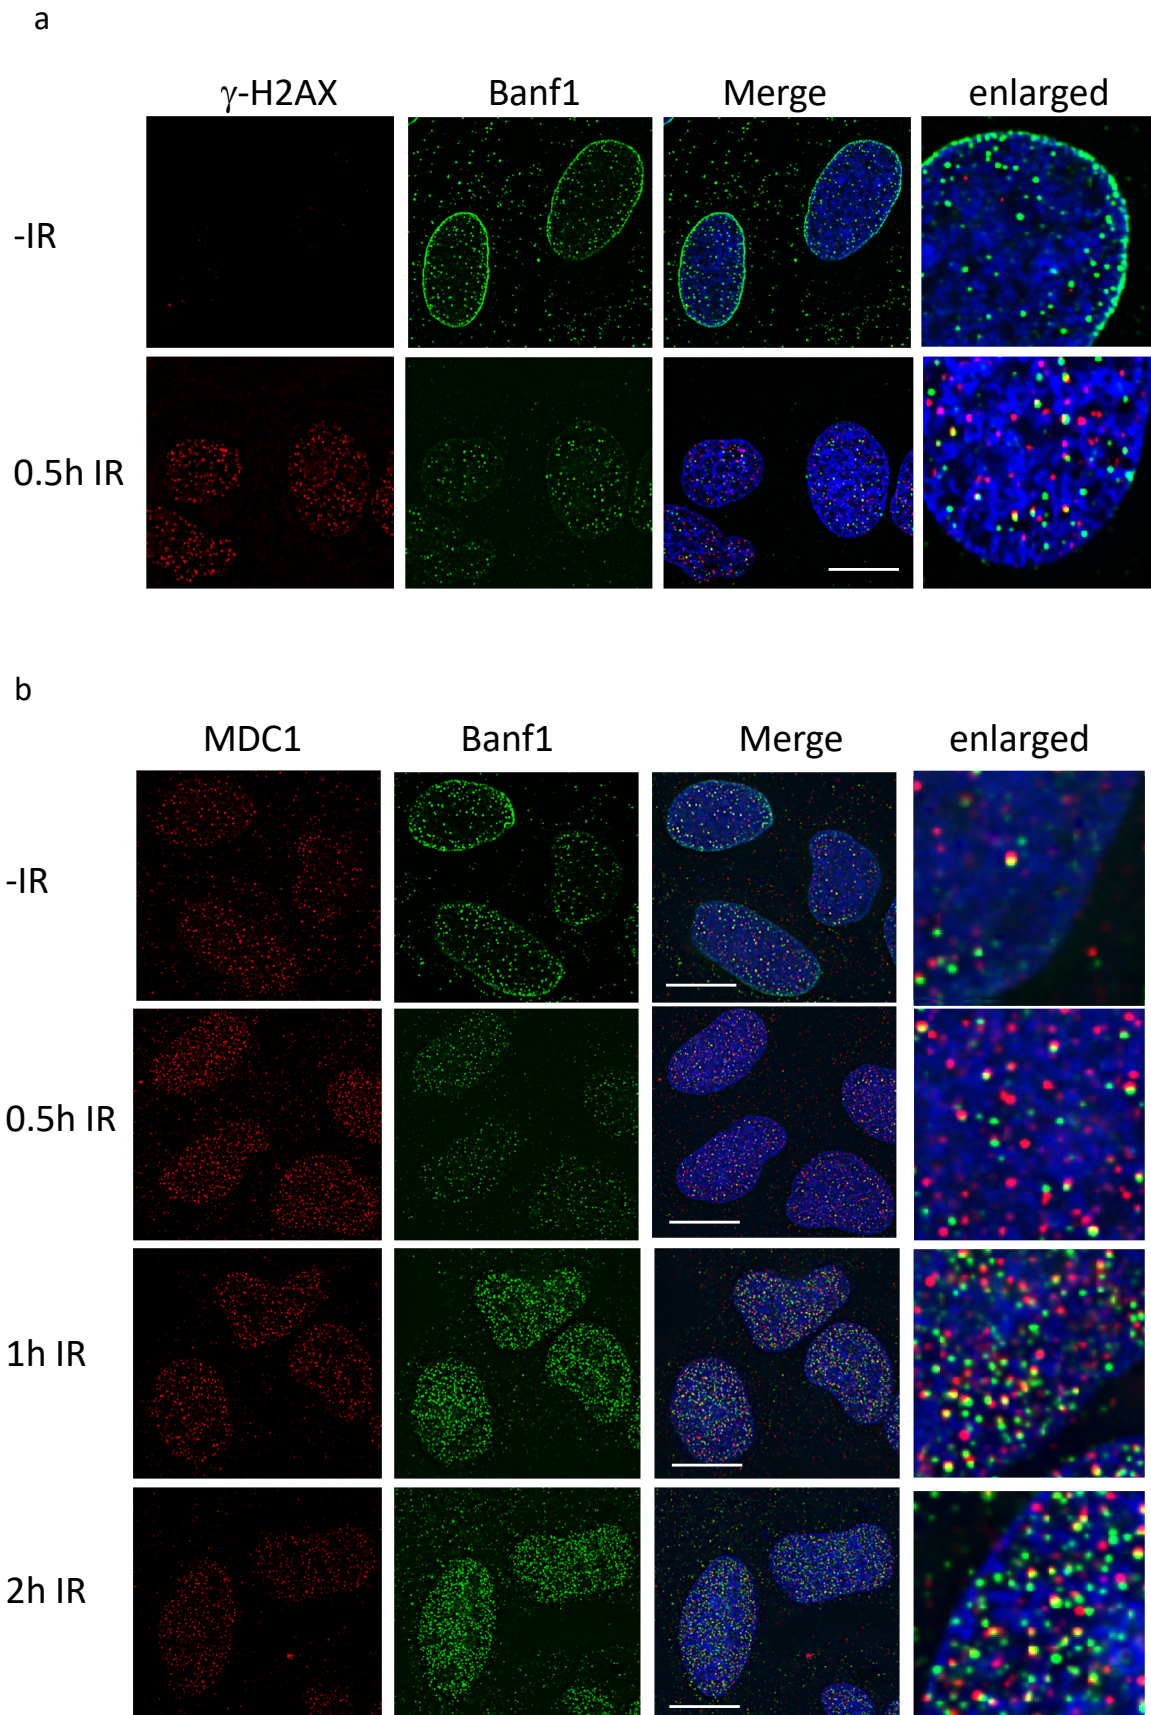

**Supplementary Figure 5.** Banf1 colocalises with DNA repair proteins after IR. **a, b** Cells were pre-extracted to remove soluble proteins, fixed at the indicated time after 6 Gy IR and stained with the indicated antibodies. Images are representative of 3 independent experiments. Immunofluorescence scale bars represent 10  $\mu$ m.

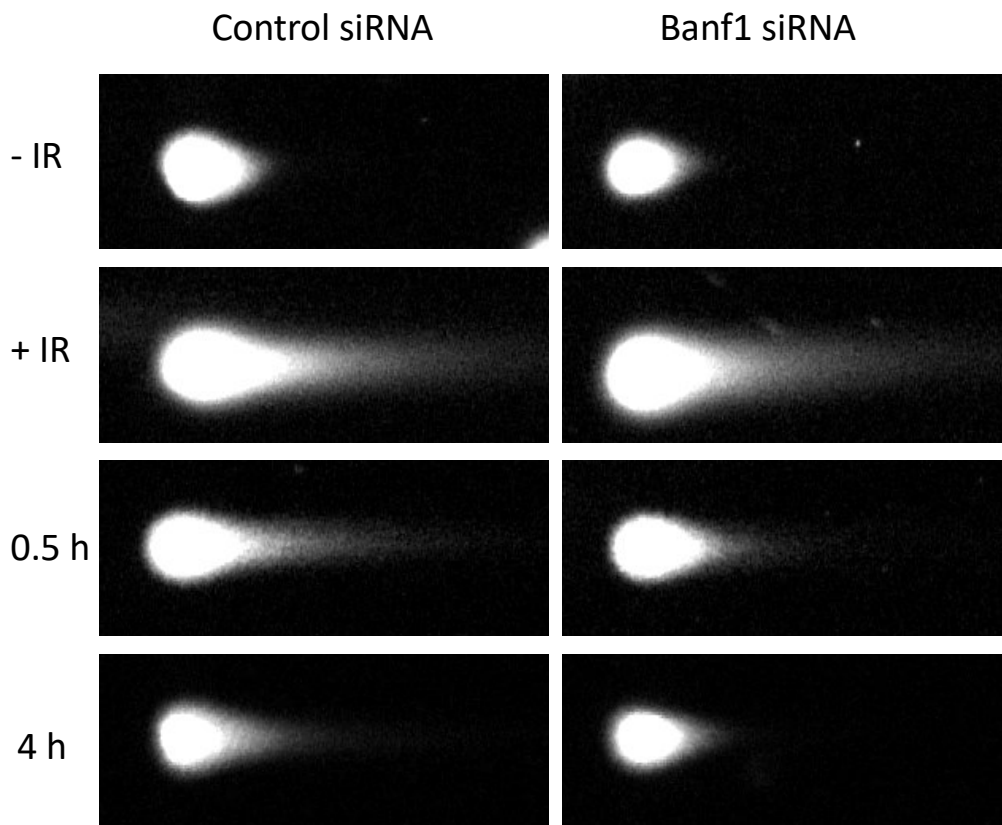

**Supplementary Figure 6.** Representative comet assay images showing the relative Olive tail moment in control or Banf1 siRNA transfected cells, at the indicated times post-IR. +IR represents immediately following IR treatment.

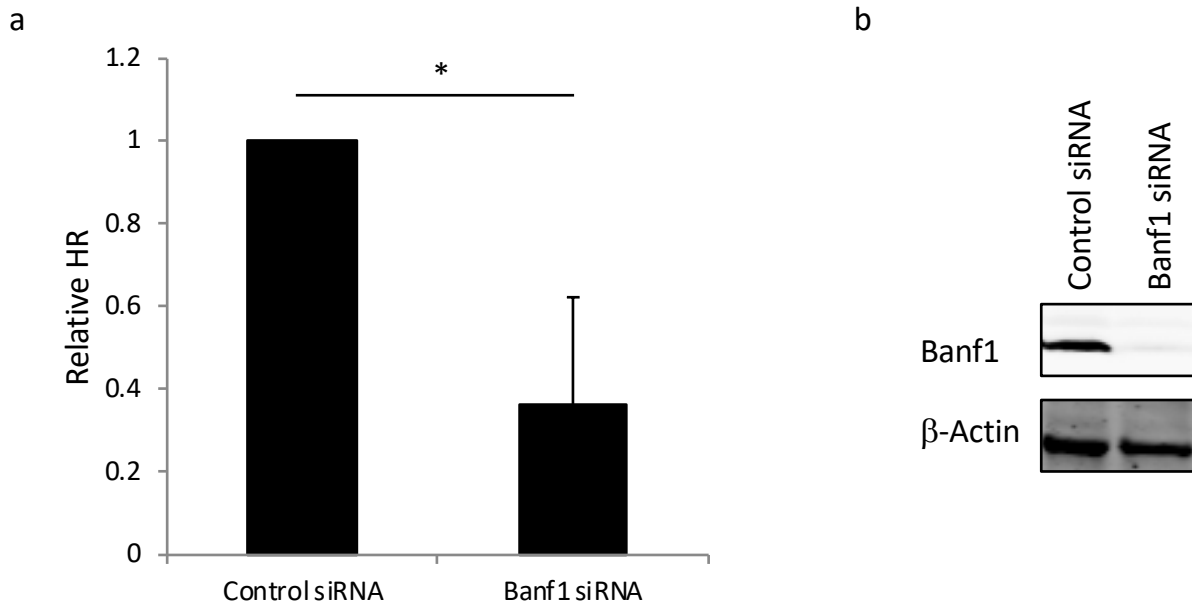

**Supplementary Figure 7.** Banf1 depletion inhibits homologous recombination. **a**, MCF7 cells stably expressing a HR DRGFP reporter were transfected with control or Banf1 esiRNA. Cells were then transfected with an ISCE1-expressing plasmid and GFP positive cells were detected via FACs. A separate GFP transfection was used as a control for each condition to correct for transfection efficiency. **b**, lysates were extracted from cells from **a**, and immunoblotted with the indicated antibodies. Histogram data represent the mean and S.D. from 4 independent experiments. T Test \*P <0.05.

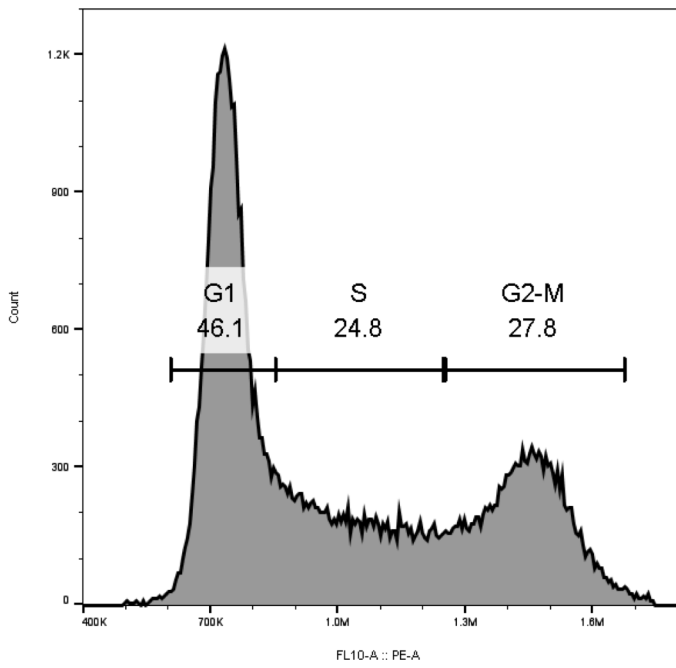

Control siRNA

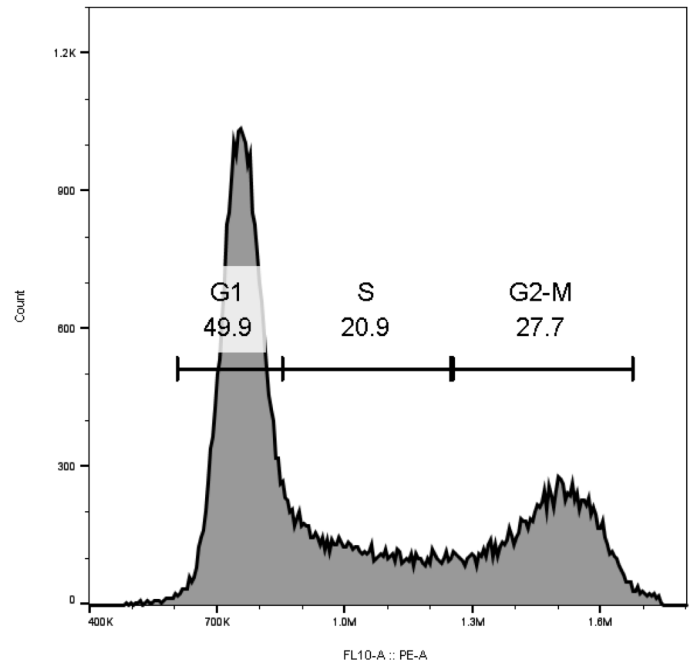

Banf1 siRNA

**Supplementary Figure 8.** Depletion of Banf1 in U2OS cells does not significantly change the cell cycle distribution. Representative cell cycle profiles of control or Banf1 siRNA transfected cells. Histogram data are representative of 3 independent experiments.



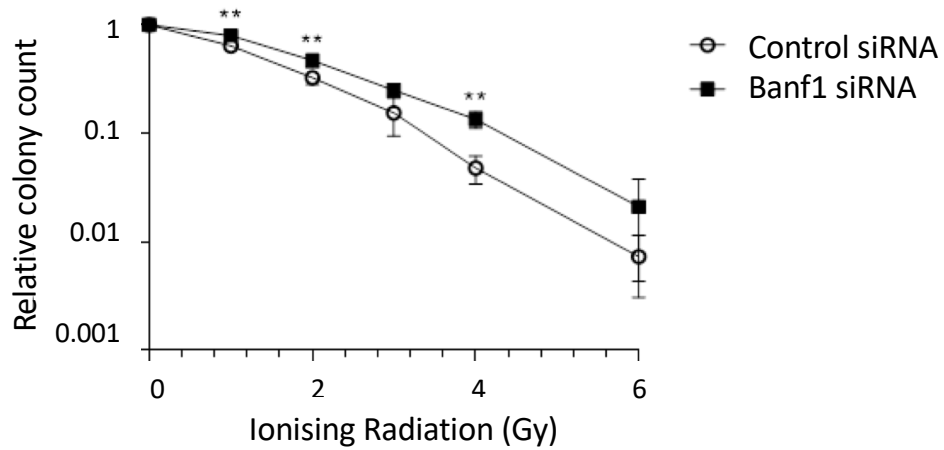

**Supplementary Figure 9.** Banf1-depletion induces radioresistance in U2OS cells. U2OS cells were transfected with control or Banf1 siRNA. 48 hours after transfection 500 cells were seeded into 6-well plates. Cells were treated or mock-treated with the indicated doses of IR and colonies were counted 10 days after exposure to IR. Histogram data represent the mean and S.D. from 3 independent experiments and t Test was used for statistical analysis \*\*P <0.01.

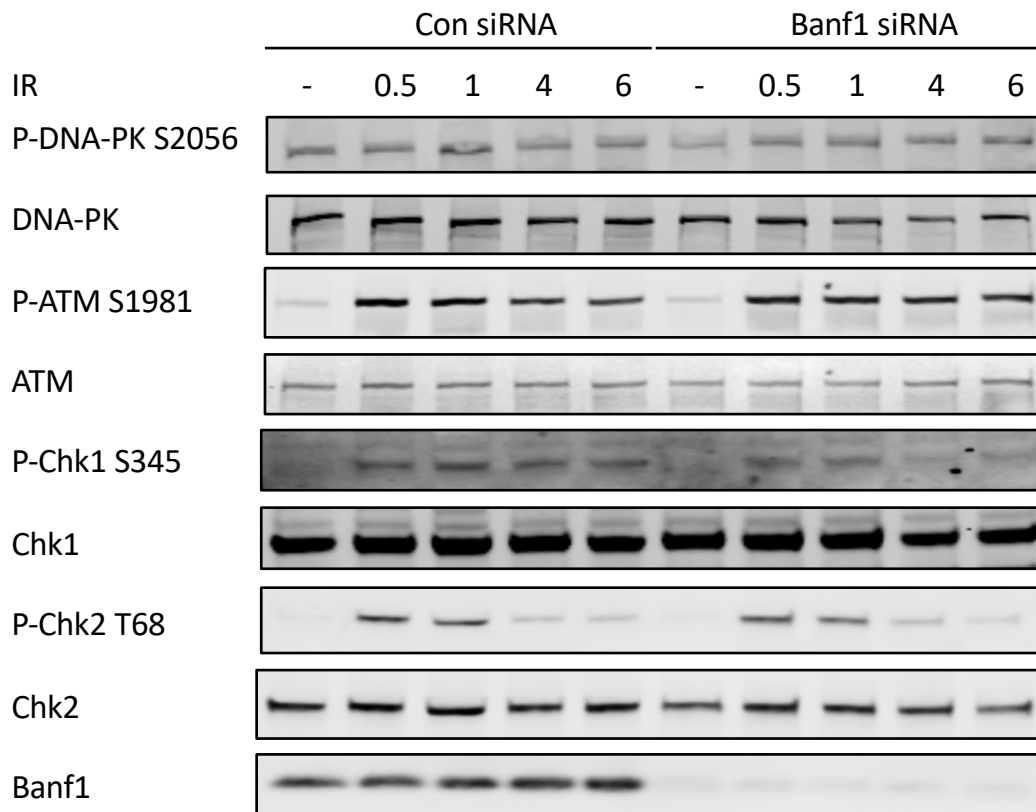

**Supplementary Figure 10.** IR-induced DNA damage signalling in Banf1 depleted cells is comparable to control cells U2OS cells were transfected with control or Banf1 siRNA and incubated for 72 hours before exposure to 6 Gy IR. Cells were lysed at the indicated times post-IR and lysates were immunoblotted with the indicated antibodies.

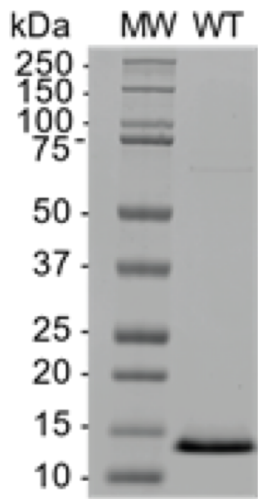

**Supplementary Figure 11.** Purification of recombinant Banf1. Recombinant Banf1 was expressed and purified from E.Coli. Recombinant Banf1 was run on a SDS PAGE gel and stained with Coomassie.

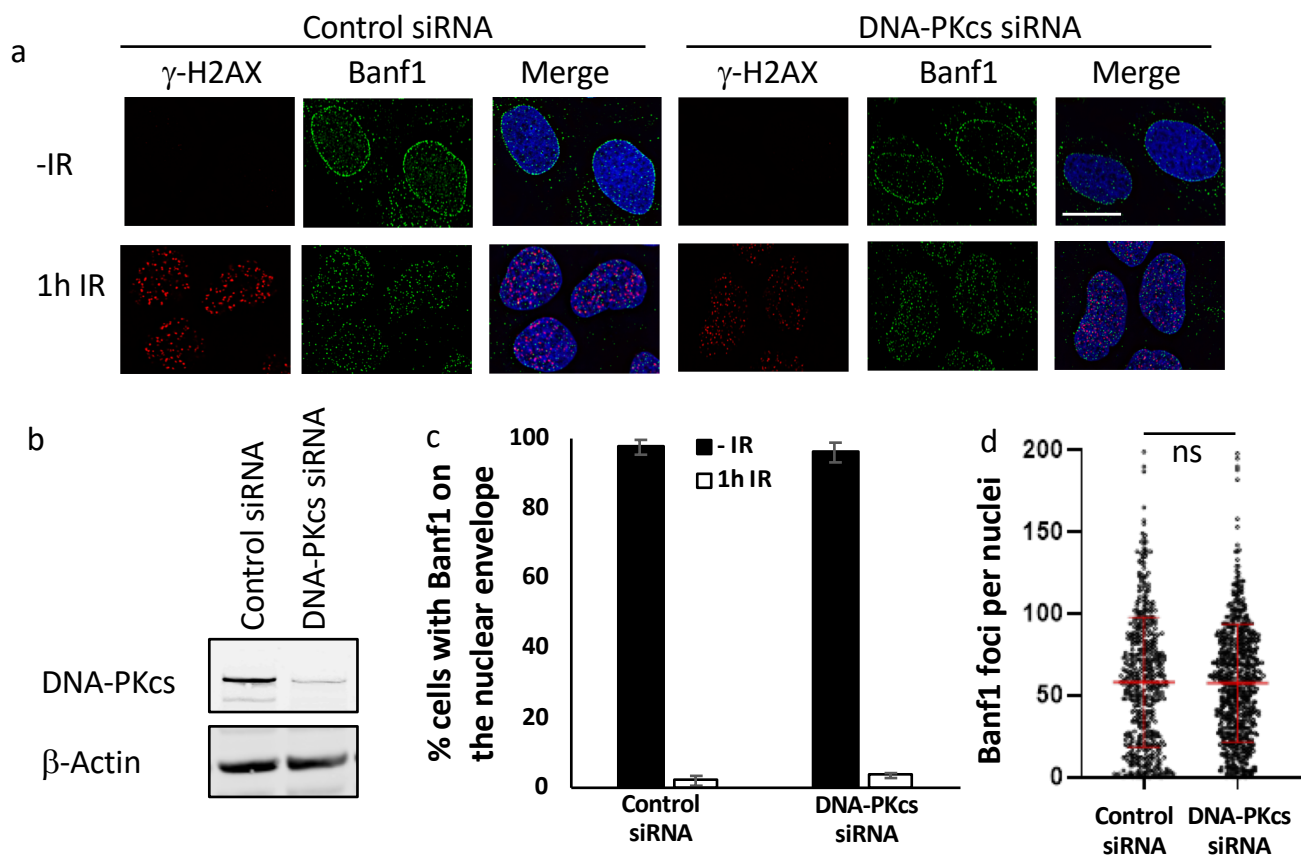

**Supplementary Figure 12.** Banf1 relocalisation from the nuclear envelope following ionising radiation is not dependent on DNA-PK in U2OS cells. **a**, **b** U2OS cells were transfected with control or DNA-PKcs siRNA and treated or mock treated with 6 Gy IR. Cells were fixed and stained with the indicated antibodies for immunofluorescence, **a**, or lysed for immunoblotting to show DNA-PKcs depletion, **b**. Representative cells stained with the indicated antibodies are shown in **a**. **c**, Nuclear envelope localisation (from **a**) was manually quantified using a Delta Vision PDV microscope. **d**, The Banf1 foci per nuclei from **a**, were imaged using an Incell 6500 and analysed with Incarta to calculate the Banf1 foci per nuclei. Statistical analysis was performed using a t-test. Histogram data represent the mean and S.D. from 3 independent experiments. 100 cells were scored for each condition in **c**. Immunofluorescence scale bars represent 10  $\mu$ m.

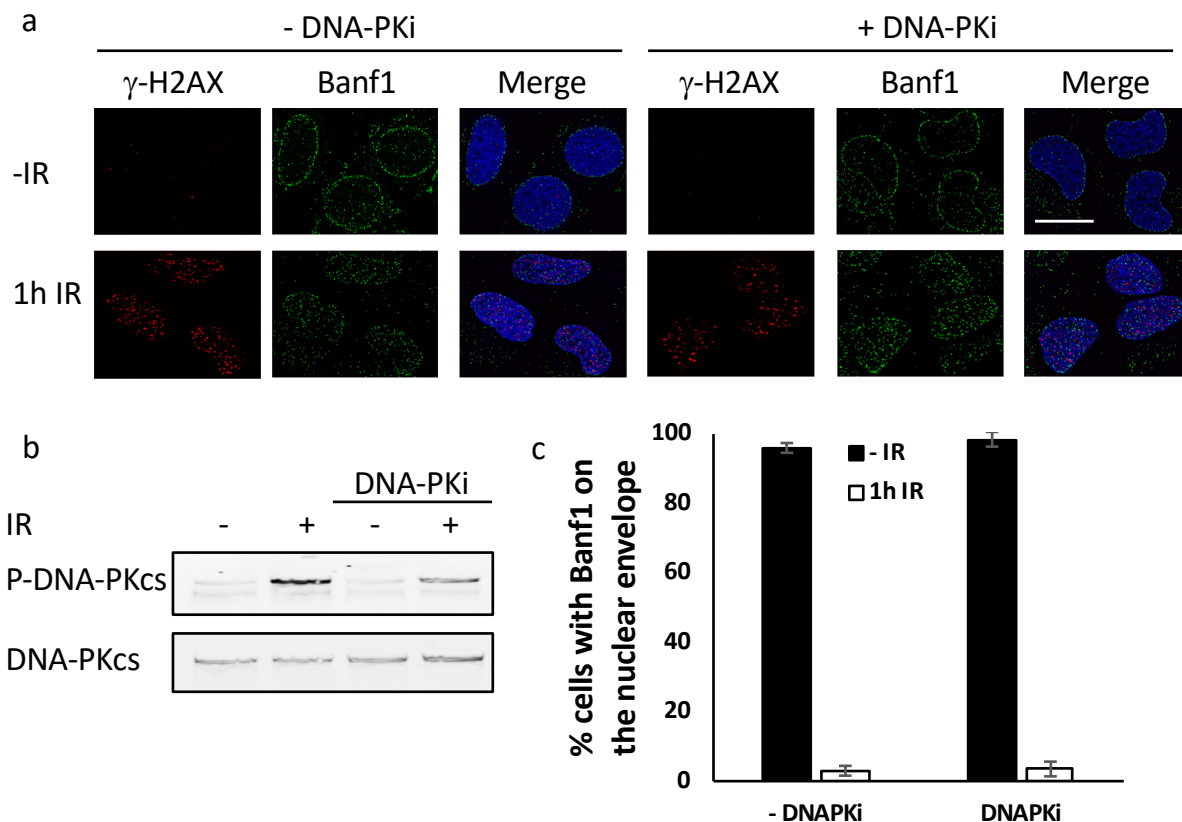

**Supplementary Figure 13.** Banf1 relocalisation from the nuclear envelope following ionising radiation is not dependent on DNA-PK in U2OS cells. **a, b**, U2OS cells were treated or mock-treated with DNA-PKcs inhibitor (DNA-Pki) for an hour before treatment or mock treatment with 6 Gy IR. Cells were fixed and stained with the indicated antibodies for immunofluorescence **a**, or lysed for immunoblotting to show DNA-PKcs **c**, Nuclear envelope localisation (from **a**) was manually quantified using a Delta Vision PDV microscope. Histogram data represent the mean and S.D. from 3 independent experiments. 100 cells were scored for each condition in **c**. Immunofluorescence scale bars represent 10  $\mu$ m.

a

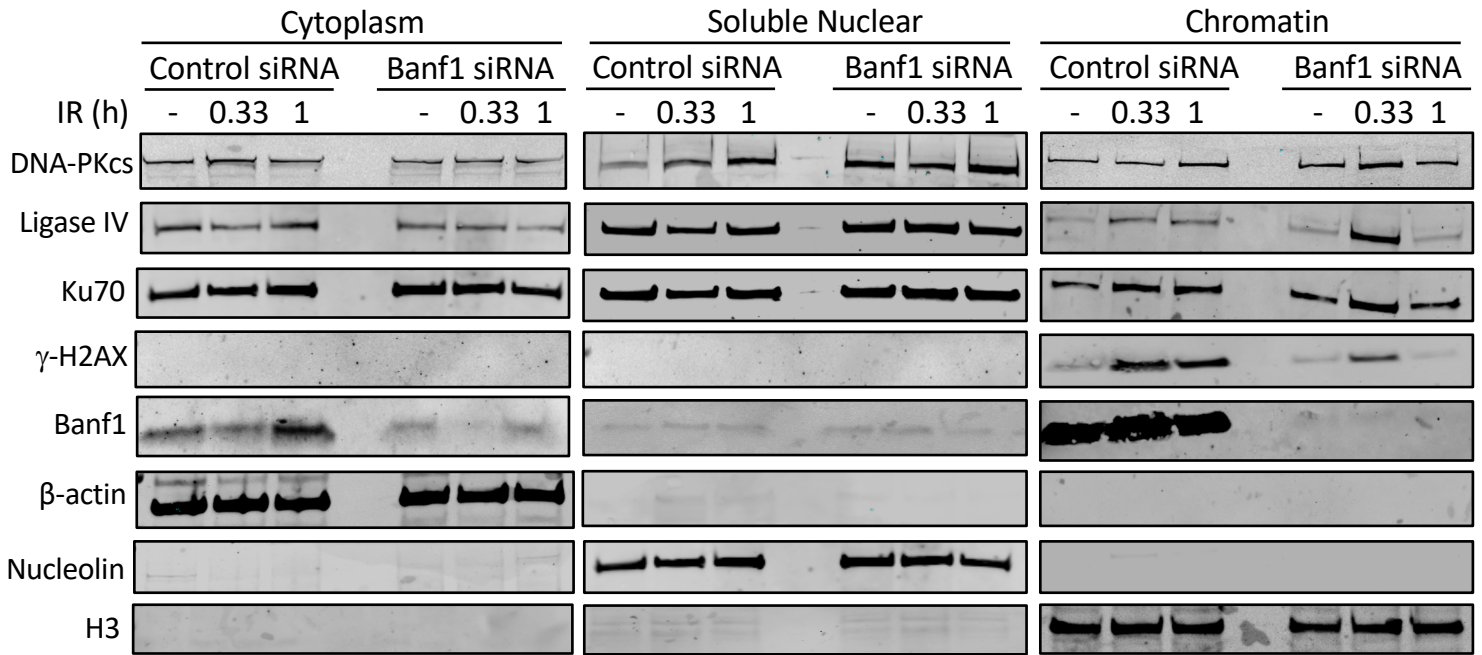

b

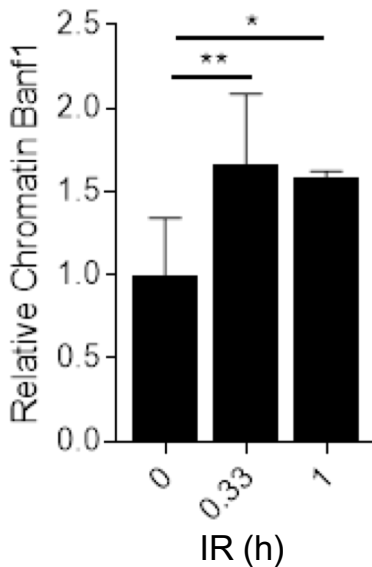

**Supplementary Figure 14. Depletion of Banf1 using siRNA leads to increased association of NHEJ proteins with the chromatin post-IR.** **a**, U2OS cells were transfected with control or Banf1 siRNA. Cells were treated or mocked treated with 6 Gy IR and cellular fractionations processed at the indicated time post-treatment. Cellular fractions were immunoblotted with the indicated antibodies. Data shown are representative of 4 independent experiments. **b**, The bands of Banf1 in the chromatin fraction were analysed via densitometry and normalised to Histone H3 bands. The histogram data shown, represent the mean and S.D. of 4 independent experiments. Paired t-test was used for statistical analysis \*P <0.05 \*\*P <0.01.
